# Supplementary material for: The Changes of Heart miR-1 and miR-133 Expressions following Physiological Hypertrophy Due to Endurance Training
Source: PubMed Central journal article supplement (PMC7481891; doi:10.22074/cellj.2020.7014), 2020-09-08
Supplement: Cell-J-22-Suppl1-133-s01.pdf [file Cell-J-22-Suppl1-133-s01.pdf]

## Supplementary Information for

# The Changes of Heart miR-1 and miR-133 Expressions following Physiological Hypertrophy due to Endurance Training

Mohammad Fathi, Ph.D.<sup>1\*</sup>, Reza Gharakhanlou, Ph.D.<sup>2</sup>, Razieh Rezaei, Ph.D.<sup>3</sup>

1. Department of Physical Education and Sport Sciences, Faculty of Humanities Sciences, Lorestan University, Khorramabad, Iran
2. Department of Physical Education and Sport Sciences, Faculty of Humanities Sciences, Tarbiyat Modares University, Tehran, Iran
3. Faculty of Physical Education and Sport Sciences, Shahid Chamran University of Ahvaz, Ahvaz, Iran

*\*Corresponding Address: P.O.Box: 68151-44316, Department of Physical Education and Sport Sciences, Faculty of Humanity Sciences, Lorestan University, Khorramabad, Iran  
Email: Fathi.m@lu.ac.ir*

**Table S1:** Primers used in the real-time polymerase chain reaction evaluation

| Target  | Primer sequence (5'-3')                                                                                                                                                                     | Tm    | Size (bp) | Accession no.  |
|---------|---------------------------------------------------------------------------------------------------------------------------------------------------------------------------------------------|-------|-----------|----------------|
| GAPDH   | F: AACCCATCACCATCTTCCAG                                                                                                                                                                     | 59.19 | 74        | NM_017008.4    |
|         | R: CACGACATACTCAGCACCAG                                                                                                                                                                     | 58.37 |           |                |
| Mef2c   | F: CCATTGGACTCACCAGACCT                                                                                                                                                                     | 58.01 | 84        | XM_003749164.1 |
|         | R: ATGTTGCCCATCCTTCAGAG                                                                                                                                                                     | 57.57 |           |                |
| Hdac4   | F: AACCTAACCTGAAATTACGGTC                                                                                                                                                                   | 60.36 | 137       | NM_053449.1    |
|         | R: ACATGCGGAGTCTGTAACATC                                                                                                                                                                    | 60.11 |           |                |
| Hand2   | F: CCAGCTACATCGCCTACCTC                                                                                                                                                                     | 59.68 | 163       | NM_022696.1    |
|         | R: TTCTTGTCGTTGCTGCTCAC                                                                                                                                                                     | 59.06 |           |                |
| Srf     | F: CACCTCCACAATCCAAACAG                                                                                                                                                                     | 56.62 | 89        | NM_001109302.1 |
|         | R: GTGCCAGGTAGTTGGTGATG                                                                                                                                                                     | 57.55 |           |                |
| miR-133 | <u>205320</u> rno-miR-133a, LNA <sup>TM</sup> PCR primer set, UniRT .miRCURY LNA <sup>TM</sup> Universal RT microRNA PCR, microRNA primer set.                                              |       |           |                |
| miR-1   | <u>205104</u> rno-miR-1, LNA <sup>TM</sup> PCR primer set, UniRT .miRCURY LNA <sup>TM</sup> Universal RT microRNA PCR, microRNA primer set.                                                 |       |           |                |
| U6      | <u>203907</u> , U6 snRNA (hsa, mmu, rno) PCR primer set, UniRT. miRCURY LNA <sup>TM</sup> Universal RT microRNA PCR, reference gene primer set. NCBI Symbol U6snRNA, NCBI Accession: x59362 |       |           |                |
